# Supplementary material for: Coffee yield peaks at intermediate shade tree cover in the mid-hills of Nepal
Source: Research Square preprint supplement (doi:10.21203/rs.3.rs-6989302/v1), 2025-07-14
Supplement: Supplementary file 1 [file d601f36e0e9229af32818b44.docx]

# Supplementary Material for:

Coffee yield peaks at intermediate shade tree cover in the mid-hills of Nepal

published in *Agroforestry Systems*

Simon Lotz1,3*, Bishnu Hari Pandit2, Hans-Peter Schmidt3, Dirk Hölscher1

1: Tropical Silviculture and Forest Ecology, Faculty of Forest Sciences and Forest Ecology, University of Göttingen, Göttingen, Germany

2: Ithaka Institute for climate farming, Ratanpur, Nepal

3: Ithaka Institute for carbon strategies, Arbaz, Switzerland

Table S1: Overview of site characteristics for each study plot.

| Plot ID | Coffee plantation  (ha) | Plantation  age  (years) | Elevation  (m a.s.l.) | MAT1 (°C) | Precipitation1  (mm) | Slope (%) | Exposition | Landuse History2 |
| --- | --- | --- | --- | --- | --- | --- | --- | --- |
| 1 | 0.33 | 19 | 692 | 21.55 | 3234.9 | 28.4 | N | SF+Planted |
| 2 | 0.33 | 11 | 660 | 21.55 | 3234.9 | 34.8 | NE | SF |
| 3 | 0.33 | 4 | 679 | 21.55 | 3234.9 | 71.2 | N | Primary |
| 4 | 0.55 | 4 | 727 | 20.85 | 3226.6 | 35.2 | E | Planted |
| 5 | 0.1 | 5 | 1017 | 19.75 | 2809.5 | 40.3 | NE | Planted |
| 6 | 0.5 | 4 | 1019 | 19.05 | 2888.4 | 41.8 | NE | SF+Planted |
| 7 | 0.5 | 11 | 1026 | 19.05 | 2888.4 | 30.7 | E | Planted |
| 8 | 0.5 | 4 | 1057 | 18.95 | 3421.5 | 33.6 | NE | Planted |
| 9 | 0.15 | 7 | 1195 | 17.45 | 3692.8 | 50 | NE | Planted |
| 10 | 0.1 | 7 | 1194 | 18.85 | 3559.8 | 57 | NE | SF+Planted |
| 11 | 0.25 | 4 | 1154 | 18.55 | 2925.3 | 17.1 | W | SF |
| 12 | 0.075 | 17 | 1275 | 18.15 | 2869.9 | 42.3 | W | Primary |
| 13 | 0.5 | 13 | 1247 | 18.45 | 2812.9 | 40.2 | SW | SF+Planted |
| 14 | 0.2 | 11 | 1249 | 18.45 | 2812.9 | 40.6 | SW | Planted |
| 15 | 2 | 6 | 608 | 21.45 | 2159.8 | 51 | E | SF |
| 16 | 2 | 6 | 591 | 21.45 | 2159.8 | 63.6 | E | SF |
| 17 | 2 | 6 | 598 | 21.45 | 2159.8 | 79.3 | E | SF |
| 18 | 2 | 6 | 636 | 22.15 | 2173.9 | 58.6 | N | Primary |
| 19 | 2 | 6 | 602 | 22.15 | 2173.9 | 51.4 | N | Planted |
| 20 | 2 | 6 | 618 | 21.45 | 2159.8 | 74 | N | SF+Planted |
| 21 | 2 | 6 | 613 | 21.45 | 2159.8 | 62.3 | NW | SF+Planted |
| 22 | 2 | 6 | 526 | 22.15 | 2173.9 | 58.1 | SE | Primary |
| 23 | 0.5 | 5 | 1093 | 18.85 | 3330 | 41.6 | SE | Planted |
| 24 | 10 | 11 | 533 | 23.45 | 2174 | 0 | NE | Planted |
| 25 | 10 | 11 | 539 | 23.45 | 2174 | 0 | NE | Planted |
| 26 | 10 | 6 | 535 | 23.45 | 2174 | 6.9 | NE | Planted |
| 27 | 10 | 6 | 540 | 23.45 | 2174 | 0 | NE | Planted |

1Mean annual temperature (MAT) and precipitation data retrieved from CHELSA V2.1 (Karger et al. 2017; Karger et al. 2018).

2SF: planting coffee in secondary forest on formerly abandoned agricultural (terraced) land;
SF+Planted: planting coffee and additional shade trees in a pre-existing secondary forest on formerly abandoned agricultural (terraced) land; Planted: planting coffee and all shade trees on agricultural land;
Primary: planting coffee into an existing forest on non-terraced land.

Table S2: Comparison of cherry counts of whole tree and calculated number of cherries based on counting 5 branches. Deviation is expressed as % on the basis of total counted number of cherries, i.e.: (Calculated Total – Counted Total)/ Counted Total x 100.

| Plot ID | Tree ID | Branch1 | Branch2 | Branch3 | Branch4 | Branch5 | No. of  branches | Count  Total | Calculated  Total | Deviation  [%] |
| --- | --- | --- | --- | --- | --- | --- | --- | --- | --- | --- |
| 13 | 1 | 7 | 12 | 13 | 13 | 2 | 12 | 121 | 112.8 | -6.8 |
| 7 | 3 | 10 | 12 | 11 | 12 | 11 | 13 | 143 | 145.6 | 1.8 |
| 23 | 1 | 18 | 27 | 19 | 6 | 5 | 11 | 158 | 165 | 4.4 |
| 5 | 3 | 17 | 10 | 10 | 18 | 6 | 19 | 239 | 231.8 | -3.0 |
| 5 | 1 | 19 | 28 | 8 | 12 | 5 | 18 | 240 | 259.2 | 8.0 |
| 23 | 4 | 17 | 26 | 12 | 10 | 46 | 15 | 345 | 333 | -3.5 |
| 7 | 7 | 21 | 14 | 48 | 25 | 13 | 16 | 378 | 387.2 | 2.4 |
| 6 | 2 | 12 | 12 | 26 | 17 | 42 | 20 | 380 | 436 | 14.7 |
| 21 | 4 | 12 | 4 | 11 | 24 | 33 | 31 | 482 | 520.8 | 8.0 |
| 23 | 10 | 30 | 24 | 18 | 13 | 29 | 23 | 587 | 524.4 | -10.7 |
| 20 | 5 | 40 | 12 | 50 | 17 | 20 | 19 | 509 | 528.2 | 3.8 |
| 11 | 6 | 32 | 24 | 7 | 57 | 33 | 29 | 906 | 887.4 | -2.1 |

Table S3: Local and scientific name of shade tree species found in the studied coffee agroforestry systems.

| **Species** | **Local name** | **No. of trees** |
| --- | --- | --- |
| *Musa spp.* | Kera | 317 |
| *Schima wallichii* | Chilauni | 86 |
| *Leucaena leucocephala* | Ipil Ipil | 56 |
| *Citrus reticulata* |  | 37 |
| *Semicarpus parviflora* | Bodhairo | 33 |
| *Alnus nepalensis* | Utis | 27 |
| *Castanopsis hystrix* | Katus | 25 |
| *Ficus subincisa* | Girule | 22 |
| *Ficus hispida* | Tothne | 21 |
| *Litsea monopetala* | Kutmero | 20 |
| *Ficus auriculata* | Dumre | 18 |
| *Albizia lebbeck* | Siris | 17 |
| *Ficus nerifolia* | Dudhauli | 15 |
| *Melia azedarach* | Bakaino | 15 |
| *Ficus semicordata* | Kanaio | 13 |
| *Shorea robusta* | Sal | 12 |
| *Persea americana* | Avocado | 11 |
| *Psidium guajava* | Guava | 9 |
| *Cedrela toona* | Toni | 8 |
| *Garunga pinata* | Dabdabe | 7 |
| *Morus alba* |  | 7 |
| *Artocarpus heterophyllus* |  | 6 |
|  | Unknown1 | 6 |
| *Citrus x limon* | Kagati | 5 |
| *Parkia speciosa* |  | 5 |
| *Prunus ceraceides* | Paiyu | 5 |
| *Brassaiopsis hainla* | Chiletro | 4 |
| *Ficus religiosa* | Pipal | 4 |
| *Dendrocalamus sp.* |  | 3 |
|  | Chilaptro | 3 |
| *Tephrosia vogelii* | Tephrosia | 3 |
| *Falconeria insignis* | Khirro | 3 |
|  | Unknown3 | 3 |
| *Dalbergia sissoo* | Sisso | 3 |
| *Ficus lacor* | Kapro | 2 |
| *Holarrhena antidysentrica* | Bankhirro | 2 |
| *Mangifera indica* | Mango | 2 |
|  | Unknown4 | 2 |
| *Artocarpus lacucha* |  | 2 |
| *Terminalia elliptica* | Saaj | 2 |
| *Michelia champaca* | Chaap | 2 |
| *Bauhinia purpurea* | Tarki | 1 |
| *Brugmansia sp.* |  | 1 |
| *Busera simaruba* | Maleto | 1 |
| *Elaeocarpus angustifolius* | Shivas tears | 1 |
| *Ficus oligodon* |  | 1 |
| *Lindera neesiana* | Siltimur | 1 |
|  | Unknown2 | 1 |
| *Oroxylum indicum* |  | 1 |
| *Grewia optiva* | Sible | 1 |
| *Choerospondias axillaris* | Lapsi | 1 |
| *Delonix regia* | Gulmo | 1 |
| *Cinnamomum camphora* | Kapur | 1 |


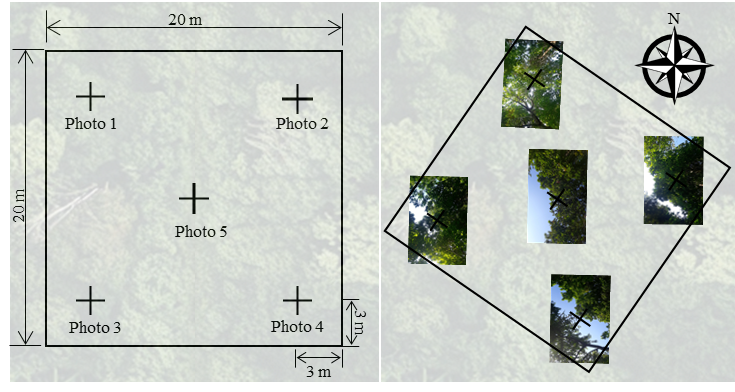


**Fig. S1** Illustration of the 20 m x 20 m monitoring plots, including the five photo and sampling locations (left). Photos were always taken with the camera aligned in a north-south direction (right)

**Dataset available under:** https://doi.org/10.5281/zenodo.15744581

**References**

Karger, D.N., Conrad, O., Böhner, J., Kawohl, T., Kreft, H., Soria-Auza, R.W., Zimmermann, N., Linder, H.P., Kessler, M., 2018. Data from: Climatologies at high resolution for the earth’s land surface areas: CHELSA V2.1 (current).

Karger, D.N., Conrad, O., Böhner, J., Kawohl, T., Kreft, H., Soria-Auza, R.W., Zimmermann, N.E., Linder, H.P., Kessler, M., 2017. Climatologies at high resolution for the earth's land surface areas. Scientific data 4, 170122. https://doi.org/10.1038/sdata.2017.122.
